# Supplementary material for: The role of methane in projections of 21st century stratospheric water vapour
Source: Copernicus journal article supplement (doi:10.5194/acp-2016-545), 2016-07-07
Supplement: Supplementary file [file acp-2016-545-AC2-supplement.pdf]

## Response to Reviewer 2

Reviewer comments are shown in black, author responses in red, and changes to the text are in blue.

In this manuscript authors use chemistry climate model (SOCOL) simulations to show that in future, the warmer tropical tropopause temperatures and stronger Brewer-Dobson circulation would lead to increased CH<sub>4</sub> flux in the stratosphere. Therefore they suggest that increased stratospheric CH<sub>4</sub> can lead to up significant enhancement in the upper stratospheric water vapour, but relatively smaller changes in the lower stratospheric water vapour. Overall, this is well written manuscript and can be published in ACP if authors can address following minor comments.

My main concern is the model's ability to simulate stratospheric water vapour correctly. Figures 1 and 2 show significant biases against observations. On Page 4 (line 32) you say that "Because the aim of this study is to analyse future changes in SWV on a multi-decadal scale, we do not anticipate that the model's shifted annual cycle in SWV will substantially bias our results" But I don't think only wording is enough. As far as know most of the models have great difficulty in simulating lower stratospheric water vapour correctly as this is combination of TTL as well as stratospheric process. But if model is missing some key process, how can it simulate future water vapour changes correctly? Can you show some other analysis that can confirm that your model is good enough to study stratospheric water vapour changes, especially in the lower stratosphere? For e.g. is it possible to show show decrease in tropical lower stratospheric ozone/ TTL temperatures when BD circulation is stronger (even in supplementary material would be good enough)

Our results show that the model has a significant bias in the simulated seasonal cycle of water vapour in the middle stratosphere. The annual mean properties (the main aim of the paper) are mostly well captured throughout the stratosphere. As shown in Figure 1a, temperature in the tropical lower stratosphere reflects the behavior of the Brewer-Dobson circulation well; a colder environment is simulated during the boreal cold period when the BDC is stronger. The same feature in the seasonal behavior of ozone is also well simulated, as shown by an additional panel in Figure 1:

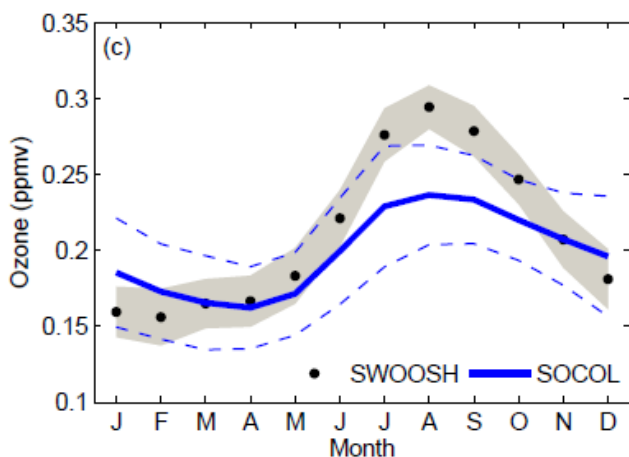

(c) Climatological-mean modelled (4.2N-4.2S, 90 hPa) annual cycle in ozone compared with merged SWOOSH observations (3.75N-3.75S, 82.5 hPa) between 1984-2015.

## Technical corrections

Page 1

1) Line 2: Abstract: why only 21st century. I think this was and will always be true. Delete "21st century"  
Changed as suggested:

Key processes driving changes in SWV include dehydration of air masses transiting the cold-point tropopause (CPT) and methane oxidation.

2) line 4: "circulation, so that more methane"

This sentence was deleted in the revised version of the manuscript.

3) line 8: "Although, methane contribution of SWV maximise in the upper stratosphere, modelled"

Changed:

Although the methane contribution to SWV maximises in the upper stratosphere, modelled SWV trends are found to be driven predominantly by warming of the CPT rather than by increasing methane oxidation.

4) line 16: repeated "ozone depletion"; just delete second one.

Changed:

Increases in SWV lead to stratospheric ozone depletion both by enhancing odd hydrogen cycles, and by increasing the prevalence of polar stratospheric clouds (PSCs) which facilitate polar springtime ozone depletion (Kirk-Davidoff et al., 1999; MacKenzie et al., 2004; Stenke and Grewe, 2005).

Page 2

5)Line 4: Oltmans and Hofmann (Nature, 1995) is better reference for Boulder data.

We have included this reference:

Between 1980 and 2010, balloon-borne measurements of SWV over Boulder, Colorado (40N) (Oltmans and Hofmann, 1995) showed an increase in SWV of ~1 ppmv (almost 30%) between 16-26 km, with ~0.25 ppmv of the net increase due to increased methane oxidation in the stratosphere (Hurst et al., 2011).

6)Line 5-10: Very long (and confusing) sentence so reword it.

Changed:

This inferred contribution of methane oxidation to the SWV trend is in good agreement with an earlier analysis (Rohs et al., 2006) of balloon-borne SWV measurements from Japan, France and Sweden, with launch sites were between 39-68N. Rohs et al. (2006) concluded that methane contributed 25-34% to the increase in water vapour in the middle stratosphere between 1978 and 2003, and a smaller amount (1.6-10.7%) in the lower stratosphere. The remaining increase was attributed to increased transport of water vapour from the troposphere to the stratosphere.

7)line 10:- "merged" or various satellite data sets

Changed:

More recently, Hegglin et al. (2014) showed that merged SWV observations from various satellite datasets display positive trends globally in the upper stratosphere due to methane increases and changes in stratospheric circulation, but negative trends in the lower stratosphere.

8) Line 13: Explain that now you are discussing modelling studies.

Unchanged:

Austin et al. (2007) also investigated the causes of past changes in SWV, but used a coupled chemistry-climate model (CCM) to do so.

9) Line 23: "that controls amount of water vapour entering in the stratosphere"

Changed:

Transport and evaporation of ice through the tropical tropopause is also a significant process that controls the amount of water vapour entering the stratosphere (Dessler et al., 2016).

10) Line 32: Forster et al., (2007) discussed reduced ozone in the tropical lower stratosphere and colder CPT. Randel et al., and Dhomse et al, discussed enhanced upwelling/ adiabatic expansion of TTL causing colder temperatures.

**We have clarified this:**

Climate models project that increasing surface temperatures will increase the rate of tropical upwelling (Butchart and Scaife, 2001; Butchart et al., 2010). This means that more methane enters the stratosphere, which will further affect SWV (Austin et al., 2007). However, enhanced tropical upwelling will not necessarily lead to increases in SWV as adiabatic expansion of the tropical tropopause layer cools the CPT (Randel et al., 2006; Dhomse et al., 2008).

Page 4:

11.line 6: First, we assess

**Changed:**

First, we assess the fidelity of SOCOL v.3's simulation of water vapour, temperature and methane through comparison with observations.

12. line 17: sits???-> lies near 100 hPa

**Changed:**

In SOCOL v.3 the WMO-defined tropopause (the lowest level at which the lapse rate decreases to 2 °C km<sup>-1</sup> or less) typically lies near 100 hPa in the tropics, while the CPT typically locates at a lower pressure of 90 hPa.

13: Figure 1: almost 25% negative bias compared to MIPAS.

**We have noted this in the revised version:**

However, the modelled annual cycle is shifted such that the annual maximum occurs a month earlier, in September rather than October (discussed further below), and SOCOL exhibits an almost 25% negative bias compared with observations between January - April.

14. line 30: (Stenke et al., 2013)

**Changed:**

The annual cycle in water vapour progresses with decreasing pressure (Randel et al., 1998), and because SOCOL v.3 has too-fast upward propagation as estimated from the water vapour tape recorder (Stenke et al., 2013), seasonal variability is shifted upwards such that maximum water vapour mixing ratios occur out-of-phase with observations.

Page 6

line 7: Do you mean lower mesospheric temperatures?

**Yes – we have corrected this:**

Between 1960 and 2100, stratospheric and mesospheric temperatures are projected to decrease, with a maximum cooling of 12 K projected for the mesosphere in the RCP 6.0-fEmis-fCH4 simulation (Fig. 5c).

line 14:Chemistry Climate Model used in Dessler et al., 2013

**Corrected:**

This is akin to looking at the change in SWV in our RCP 6.0-fEmis-fCH4 simulation (Fig. 5a) and indeed the results are very similar, with both the GEOSCCM (Goddard Earth Observing System Chemistry

Climate Model used by Dessler et al., 2013) and SOCOL v.3 models simulating an increase in SWV due to climate-related changes of ~1 ppmv through the 21st century.

Page 7

Line 10 and 13: Repeated "because"

This was intentional.

line 30: Compared to Page 8: Line 19: or "dehydration due to PSCs?"

Sorry, this comment is not clear to us – perhaps the wrong page and line numbers have been referenced.
